# Supplementary material for: Activation and Functional Connectivity of the Left Inferior Temporal Gyrus during Visual Speech Priming in Healthy Listeners and Listeners with Schizophrenia
Source: PubMed Central journal article supplement (PMC5350153; doi:10.3389/fnins.2017.00107), 2017-03-15
Supplement: Presentation1.pdf [file Presentation1.pdf]

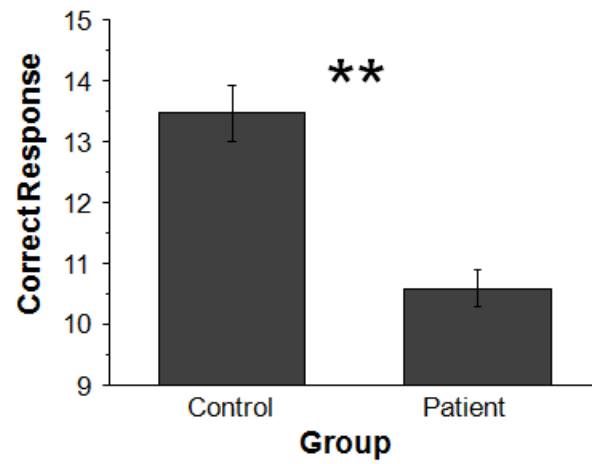

**Figure S1.** Difference in percentage of correct button-press response for recognizing target speech against speech masking during fMRI scanning between healthy controls and participants with schizophrenia. \*\*  $p < .001$

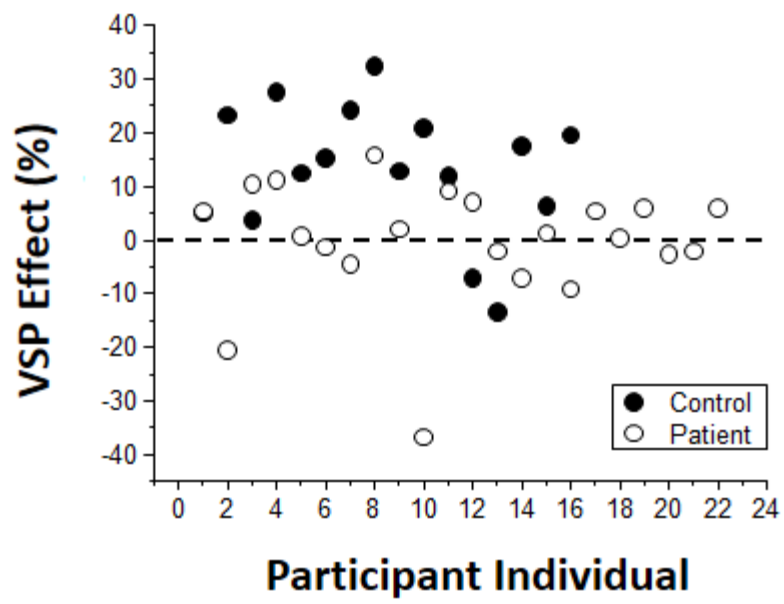

**Figure S2.** The scatter plot of VSP Effects of healthy controls and people with schizophrenia in the behavioral testing.

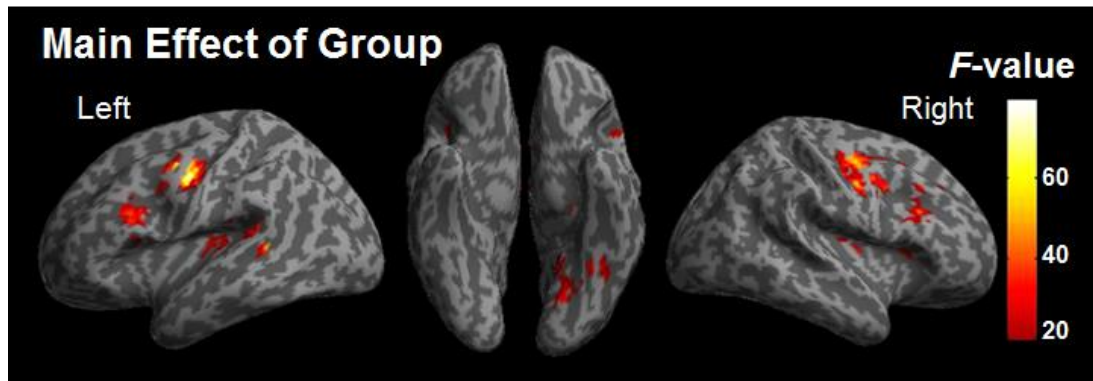

**Figure S3.** Voxels that exhibited a main effect of group difference (healthy controls versus people with schizophrenia). The activation map is thresholded at  $p < 0.05$  with voxel-wise false discovery rate (FDR) correction ( $F$  value  $> 19.51$ ).

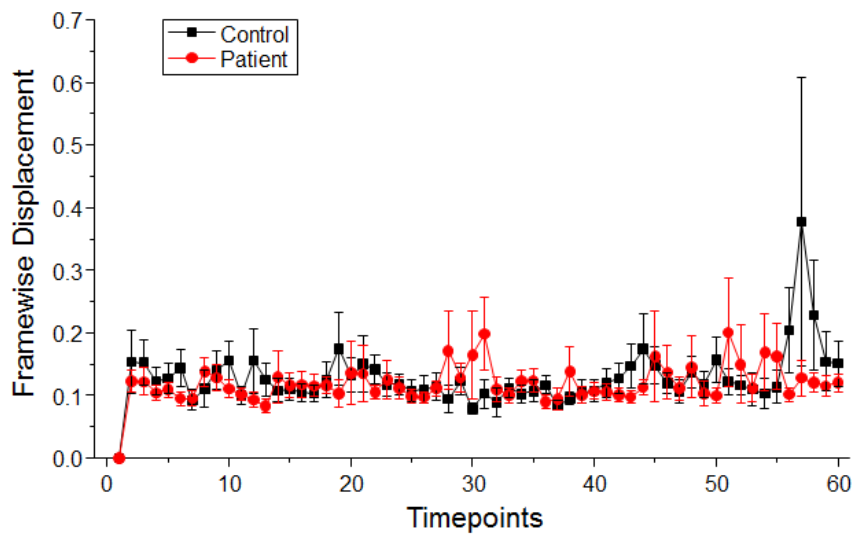

Figure S4. Comparison in framewise displacement (FD) between controls and patients. Error bars indicate the standard errors of the mean.

**Table S1. MNI Coordinates of the Brain Regions Revealed by the Group-Level ANOVA of Whole-Brain Data**

| Contrast            | Coordinates |     |     | Statistics |                |                 |         | Location      |
|---------------------|-------------|-----|-----|------------|----------------|-----------------|---------|---------------|
|                     | X           | Y   | Z   | k          | <i>p</i> (FDR) | <i>F</i> -value | Z score |               |
| Main Effect         | -45         | -10 | 38  | 57         | .000           | 59.531          | 6.461   | L Postcentral |
| (Control > Patient) | 42          | -7  | 34  | 432        | .001           | 43.576          | 5.701   | R Precentral  |
|                     | -12         | -4  | 14  | 40         | .001           | 40.358          | 5.521   | L Caudate     |
|                     | -51         | -43 | 14  | 60         | .001           | 40.399          | 5.523   | L STS         |
|                     | 39          | 20  | 18  | 95         | .005           | 35.127          | 5.204   | R TriIFG      |
|                     | -21         | -64 | -18 | 93         | .022           | 28.876          | 4.773   | L Fusiform    |
|                     | 27          | -28 | 6   | 52         | .024           | 28.430          | 4.740   | R Thalamus    |
|                     | -39         | 17  | 22  | 74         | .025           | 27.951          | 4.704   | L TriIFG      |
|                     | -36         | -52 | -18 | 56         | .034           | 26.071          | 4.558   | L pITG        |

*Note* For the 2 (group: control, patients) \* 2 (condition: ASP > baseline, ANSP > baseline) ANOVA, only the main effect of group was significant at  $p < .05$  (voxel-wise FDR corrected with an extent threshold of more than 40 voxels;  $F$  value > 19.51). MNI coordinates, k (number of voxels), T-value, and Z scores are provided. pITG = posterior inferior temporal gyrus; STS = superior temporal sulcus; TriIFG = pars triangularis of inferior frontal gyrus; L = left; R = right.

**Table S2. Brain Regions Exhibiting Differential Connectivity with Left Posterior Inferior Temporal Gyrus Associated with “VSP versus VNSP” and “VSNP versus VSP” in Healthy Controls and Participants with Schizophrenia**

| Group   | Contrast   | Coordinates |     |     | Statistics |      |         | Location           |
|---------|------------|-------------|-----|-----|------------|------|---------|--------------------|
|         |            | X           | Y   | Z   | k          | T    | Z-score |                    |
| Control | VSP > VNSP | -33         | -52 | -34 | 78         | 7.19 | 5.48    | L Cerebellum6      |
|         |            | -39         | -58 | -34 | 54         | 5.64 | 4.64    | L Cerebellum_Crus1 |
|         |            | -36         | -16 | -2  | 57         | 6.70 | 5.23    | L Insular          |
|         |            | -57         | -13 | -10 | 42         | 6.48 | 5.11    | L MTG              |
|         |            | 39          | -25 | -2  | 205        | 6.51 | 5.13    | R STG              |
|         |            | -39         | -40 | 62  | 47         | 6.14 | 4.93    | L Postcentral      |
|         |            | -42         | -7  | 58  | 43         | 4.79 | 4.11    | L Precentral       |
|         |            | 3           | -79 | -42 | 169        | 6.03 | 4.87    | Cerebelum_7b_R     |
|         |            | 36          | -55 | -38 | 142        | 5.25 | 4.41    | Cerebelum_Crus1_R  |
|         |            | -51         | 8   | 14  | 51         | 5.78 | 4.72    | L OperIFG          |
|         |            | 9           | 47  | 26  | 115        | 5.70 | 4.68    | R mSFG             |
|         |            | 3           | 44  | 42  | 77         | 5.10 | 4.31    | L mSFG             |
|         |            | 36          | 38  | 42  | 41         | 5.62 | 4.63    | R MFG              |
|         |            | -63         | -37 | 26  | 117        | 5.03 | 4.27    | L SupraMarginal    |
|         |            | -9          | 8   | 46  | 40         | 4.46 | 3.89    | LSMA               |
| Control | VSP < VNSP | 42          | -43 | 2   | 42         | 6.95 | 5.35    | R STG              |
|         |            | 39          | -67 | 6   | 51         | 5.28 | 4.43    | R MOC              |
| Patient | VSP > VNSP | -15         | 17  | 42  | 52         | 5.15 | 4.52    | L SFG              |

|            |     |     |    |     |      |      |            |
|------------|-----|-----|----|-----|------|------|------------|
| VSP < VNSP | -42 | -31 | 14 | 108 | 5.86 | 5.00 | L RO       |
|            | 36  | -16 | 14 | 46  | 5.83 | 4.98 | R Insular  |
|            | 51  | -1  | 10 | 108 | 5.29 | 4.62 | R RO       |
|            | -30 | -70 | -2 | 63  | 5.50 | 4.76 | L Fusiform |
|            | 21  | -19 | -2 | 75  | 4.88 | 4.33 | R Thalamus |
|            | -12 | -37 | -2 | 70  | 4.61 | 4.13 | L Lingual  |

---

All peaks are significant at  $p < 0.05$  (voxel-wise FDR corrected with an extent threshold of more than 40 voxels; T value  $> 4.46$  for patient group and T value  $> 4.21$  for control group). MNI coordinates, k (number of voxels), T-value, and Z scores are provided. MTG = middle temporal gyrus; MOC = middle occipital cortex; OperIFG = pars opercularis of inferior frontal gyrus; RO = Rolandic operculum; mSFG = medial superior frontal gyrus; STG = superior temporal gyrus; L = left; R = right.
